# Supplementary material
Source: publisher figshare collection journal article supplement (https://frontiersin.figshare.com/ndownloader/files/28809777)

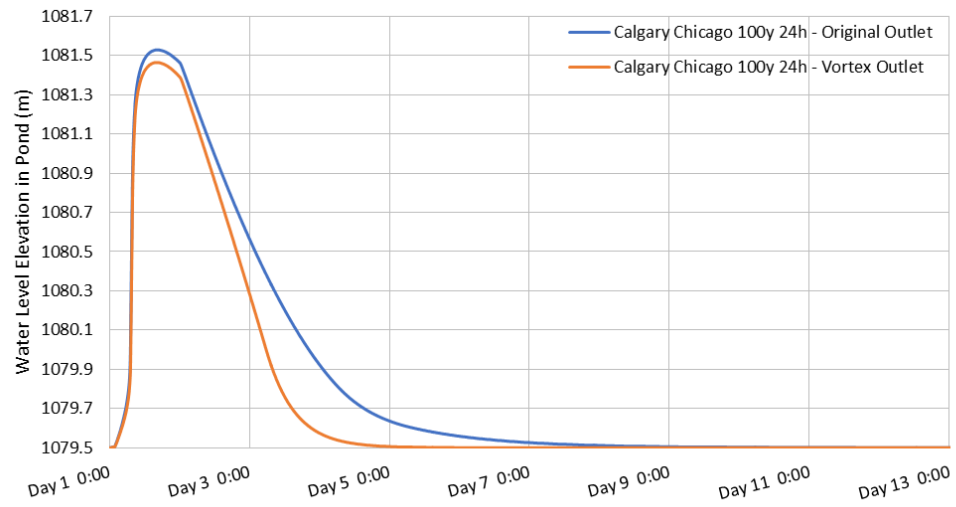

**Supplementary Figure S3** Evaluation of Benefits of Enhancing the Discharge from a Storm Pond

Supplement: Supplementary file 1 [file 28809777]
